# Supplementary figures and images for: Examining Treatment Decision‐Making Among Patients With Axial Spondyloarthritis: Insights From a Conjoint Analysis Survey
Source: PubMed Central journal article supplement — ACR Open Rheumatol. 2020 Jun 9;2(7):391–400. doi: 10.1002/acr2.11151 (PMC7368141; doi:10.1002/acr2.11151), 2020-06-09

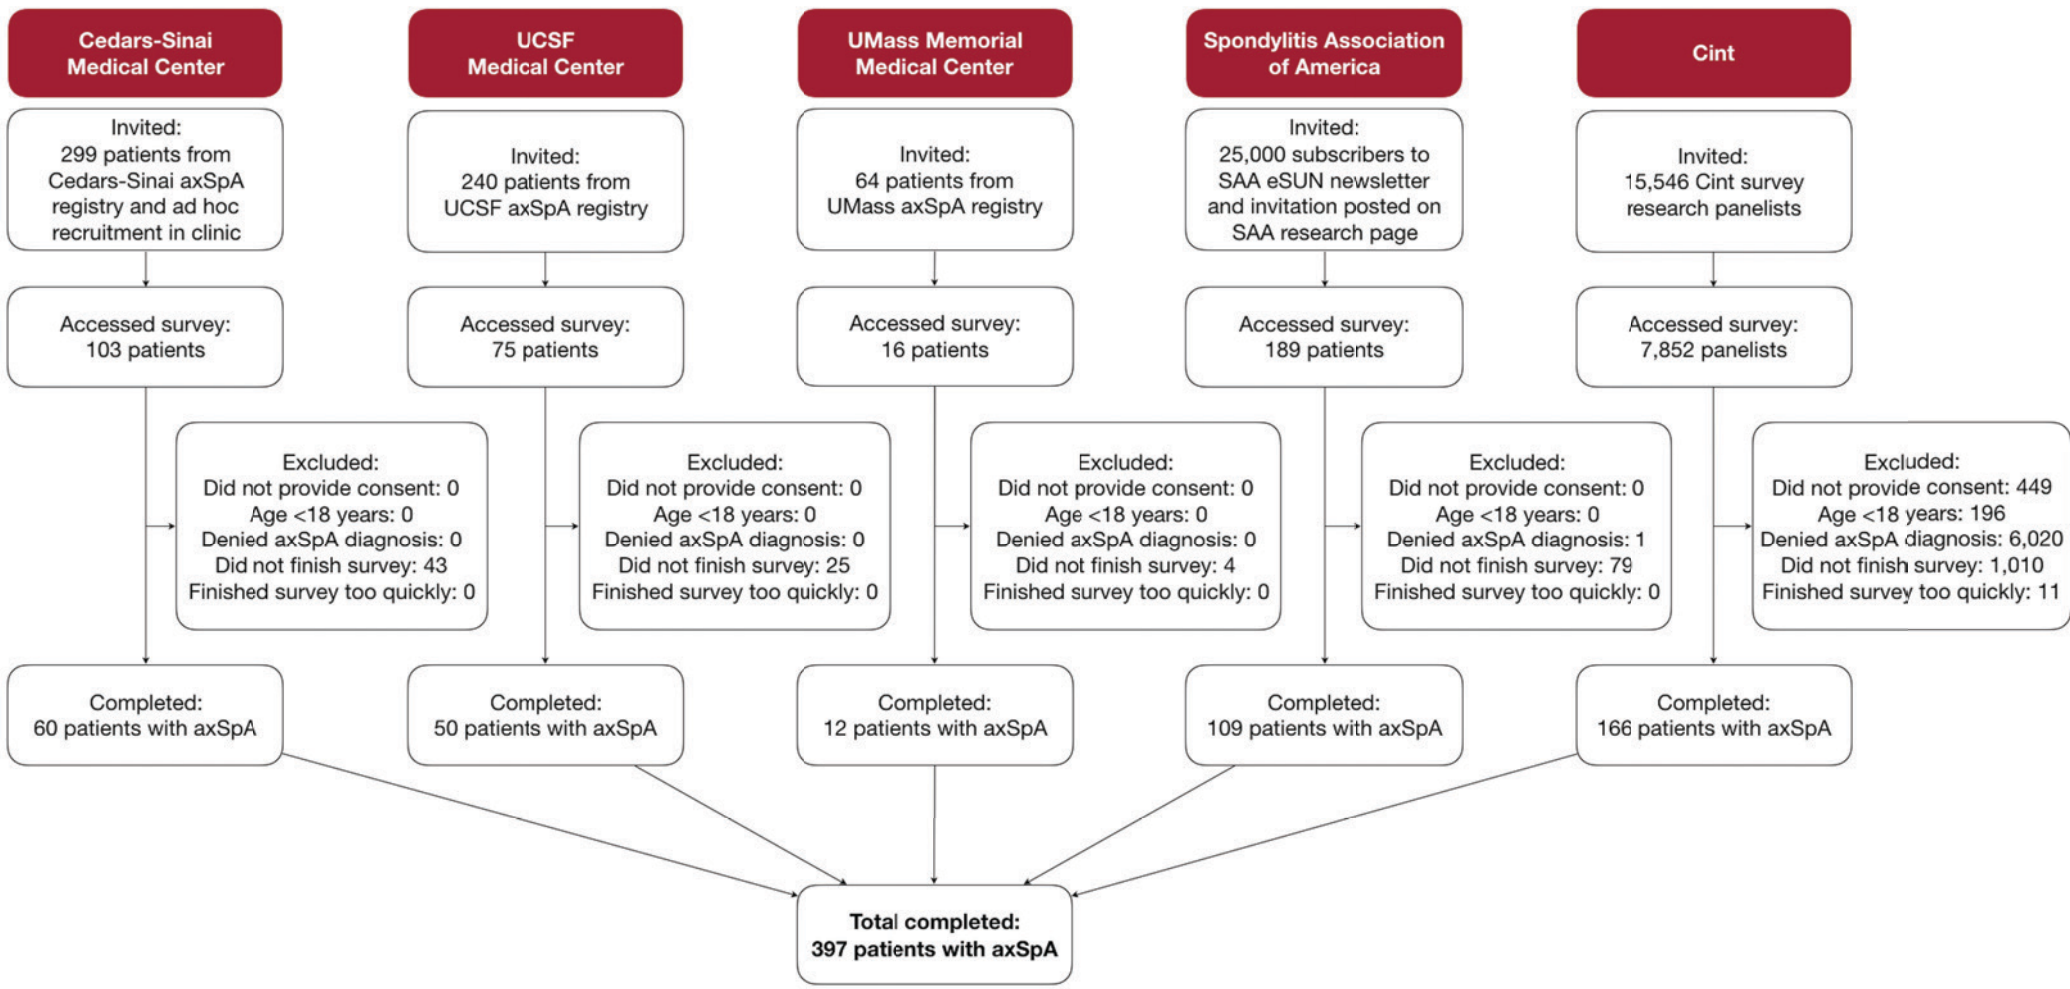

Supplement: ACR2-2-391-s002.pdf [file ACR2-2-391-s002.pdf]
